# Supplementary material for: Macrophages retain hematopoietic stem cells in the spleen via VCAM-1
Source: PubMed Central journal article supplement — J Exp Med. 2015 Apr 6;212(4):497–512. doi: 10.1084/jem.20141642 (PMC4387283; doi:10.1084/jem.20141642), 2015-04-06
Supplement: supp_jem.20141642_JEM_20141642_sm.pdf [file supp_jem.20141642_JEM_20141642_sm.pdf]

## SUPPLEMENTAL MATERIAL

Dutta et al., <http://www.jem.org/cgi/content/full/jem.20141642/DC1>

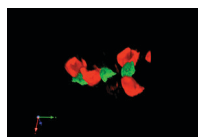

**Video 1. Interaction between HSPC and VCAM-1<sup>+</sup> macrophages in the spleen.** The video shows interaction between GFP<sup>+</sup> HSPC (green) and VCAM-1<sup>+</sup> (red) F4/80<sup>+</sup> (blue) macrophages in the spleen.
